# Supplementary material
Source: PubMed Central journal article supplement (PMC4511965)
Supplement: NIHMS690598-supplement-1.pdf [file NIHMS690598-supplement-1.pdf]

Table S1

## RT-PCR primers

| Primer     | Sequence                                  |
|------------|-------------------------------------------|
| TMPRSS2-1f | 5'- CAG GAG GCG GAG GCG GA -3';           |
| ERG-1r     | 5'- GGC GTT GTA GCT GGG GGT GAG-3''.      |
| TMPRSS2-2f | 5'- TAG GCG CGA GCT AAG CAG GAG -3'       |
| ERG-2r     | 5'- GTA GGC ACA CTC AAA CAA CGA CTG G -3' |

Table S2

## Real time PCR primers

| Primer     | Sequence                                  |
|------------|-------------------------------------------|
| TMPRSS2-2f | 5'- TAG GCG CGA GCT AAG CAG GAG -3'       |
| ERG -2r    | 5'- GTA GGC ACA CTC AAA CAA CGA CTG G -3' |

Table S3

## ChIP PCR primers

| Primer             | Sequence                             |
|--------------------|--------------------------------------|
| TMPRSS2 ChIP I f   | 5'- CCC AAA GCT GGC TCC TAG TC-3'    |
| TMPRSS2 ChIP I r   | 5'- CCA AAC AAA GAA GCC AAC CGA C-3' |
| TMPRSS2 ChIP II f  | 5'-GCT GAA GAC AGG CTG GGT GAT C-3'  |
| TMPRSS2 ChIP II r  | 5'-AGA ACC TCC CAC CCT CGG TAT CT-3' |
| ERG ChIP I f       | 5'-GAG CAT GGC CAG GGA TGA TC-3'     |
| ERG ChIP I r       | 5'-GCA TCT CGG CCT TCA TCC TT-3'     |
| ERG ChIP II(III)f  | 5'- CTG ATT CAT CCT GCC AGC CAC-3'   |
| ERG ChIP II(III) r | 5'- CCT GGC CTC AGC TTC TCA GAA G-3' |
| ERG ChIP IV f      | 5'-GAG GGA GAG GTG CAA ATT AGA G-3'  |
| ERG ChIP IV r      | 5'-GGC TGA AGG ACA GGG ATT G-3'      |
| GAPDH f            | 5'-CCA TCA CTG CCA CCC AGA AG-3'     |
| GAPDH r            | 5'-AGC TTC CCG TTC AGC TCA GG-3'     |

Table S4 3C  
primers

---

| GENE           | Forward Primer                          |
|----------------|-----------------------------------------|
| RRP1B          | 5'-GCA CCT CAC ACT CAG GAT GCC-3'       |
| PKNOX1         | 5'-CTT CCT CGC TGA AGA TGC TTC C-3'     |
| TMPRSS3        | 5'-TCG GCT GGC TCA GCA GG-3'            |
| ABCG1          | 5'-AAG GCC ATT GAA CAC CCA ACA CC-3'    |
| TMPRSS2        | 5'-AAG TGC AGT CCT AAC CTC CTG G-3'     |
| BACE2          | 5'-GTG GTC TTG GTG CAG CCA AC-3'        |
| DSCAM          | 5'-TTC GCT ATT GTG GCG ATG CAA GG-3'    |
| PCP4           | 5'-ATG ACT GTG TGG GTC TCC AGG-3'       |
| SH3BGR         | 5'-CAT CCA TCC ATC TCT CCA TCC ATC C-3' |
| WRB            | 5'-AAG GCG GAG TCC TCA AAG ATT GG-3'    |
| BRWD1          | 5'-CGT GCA CTG TGT GTT GAC TGC-3'       |
| ETS2           | 5'-TAG CAC AGC CTC-3                    |
| Reverse Primer |                                         |
| ERG            | 5'-AAG GTA CCA GAG GAG GAC CAG C-3'     |

---

| <b>Table S5 – ANOVA p-Values for ChIP Assays</b> |                        |                       |
|--------------------------------------------------|------------------------|-----------------------|
|                                                  | <b>Site IV</b>         | <b>Site II/III</b>    |
| <b>Figure 6</b>                                  |                        |                       |
| AR                                               | $1.04 \times 10^{-6}$  | 0.019                 |
| LSD1                                             | $6.17 \times 10^{-5}$  | 0.00015               |
| 8-oxo-G                                          | $1.66 \times 10^{-8}$  | $3.64 \times 10^{-8}$ |
| OGG1                                             | $1.91 \times 10^{-12}$ | $5.61 \times 10^{-6}$ |
| <b>Figure 8</b>                                  |                        |                       |
| 8a                                               |                        |                       |
| APE1                                             | $7.49 \times 10^{-11}$ | 0.0041                |
| XRCC1                                            | $6.03 \times 10^{-10}$ | $3.00 \times 10^{-5}$ |
| 8b                                               |                        |                       |
| ATM                                              | $5.98 \times 10^{-7}$  | $8.60 \times 10^{-6}$ |
| ATR                                              | 0.84                   | 0.51                  |
| $\gamma$ H2AX                                    | $1.49 \times 10^{-12}$ | $9.20 \times 10^{-6}$ |
| 8c                                               |                        |                       |
| MRE11                                            | $4.29 \times 10^{-8}$  | 0.0021                |
| RAD51                                            | $7.29 \times 10^{-6}$  | $3.11 \times 10^{-6}$ |
| NBS1                                             | 0.186                  | 0.14                  |
| RPA                                              | $3.01 \times 10^{-6}$  | $6.59 \times 10^{-6}$ |
| BRCA2                                            | $1.38 \times 10^{-9}$  | $4.89 \times 10^{-6}$ |
| 8d                                               |                        |                       |
| DNA-PK                                           | $9.74 \times 10^{-7}$  | 0.044                 |
| Ku80                                             | $1.23 \times 10^{-14}$ | $1.03 \times 10^{-6}$ |
| Ku70                                             | $3.28 \times 10^{-8}$  | 0.0018                |
| XRCC4                                            | $6.74 \times 10^{-7}$  | 0.0012                |
| Histone H1                                       | 0.0028                 | 0.060                 |
| 8e                                               |                        |                       |
| IgG                                              | 0.0011                 | 0.010                 |
| <b>Figure S6</b>                                 |                        |                       |
| OGG1                                             | $1.91 \times 10^{-12}$ | $5.61 \times 10^{-6}$ |
| OGG1 + irradiation                               | $4.00 \times 10^{-9}$  | 0.013                 |
| OGG1 + enzalutamide                              | $1.88 \times 10^{-11}$ | 0.0060                |
