# Supplementary material
Source: PubMed Central journal article supplement (PMC4511965)
Supplement: NIHMS690598-supplement-2.pdf [file NIHMS690598-supplement-2.pdf]

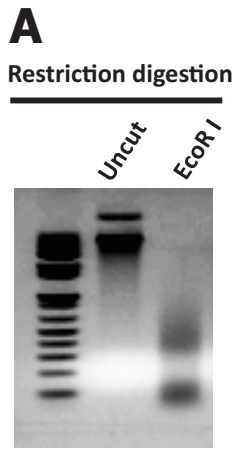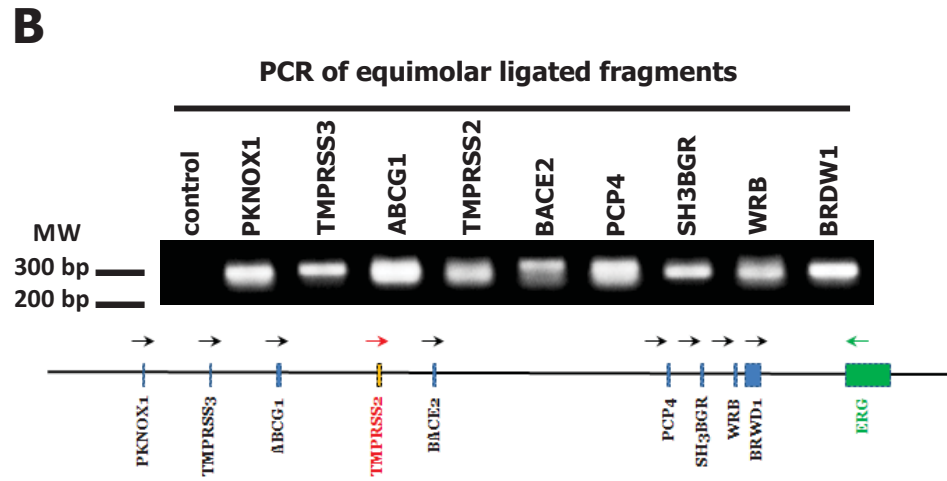

**C**

DHT induces chromosome conformation change

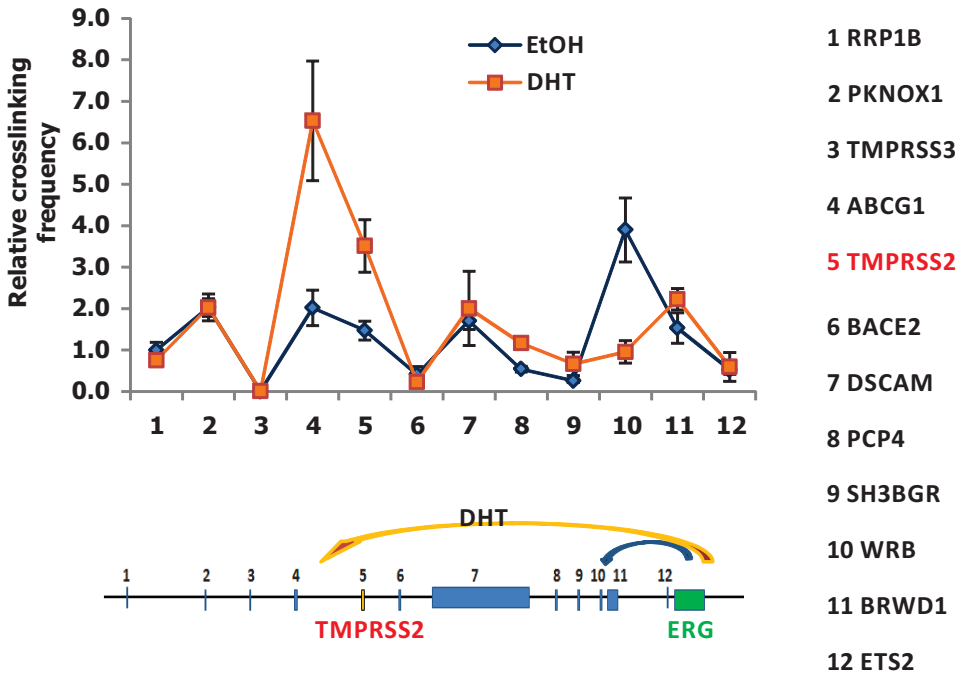

**A**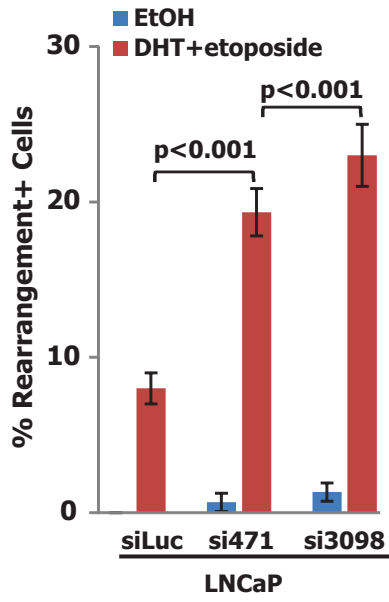**B**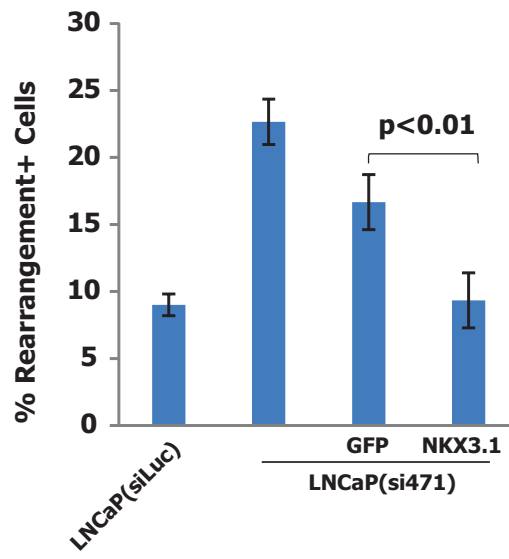**C**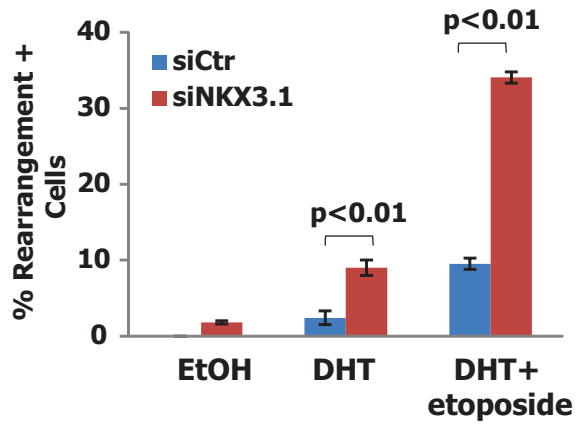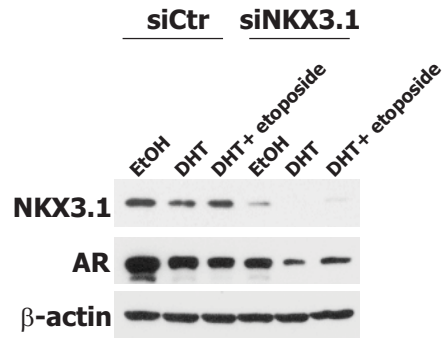

**Bowen and Gelmann  
Figure S2**

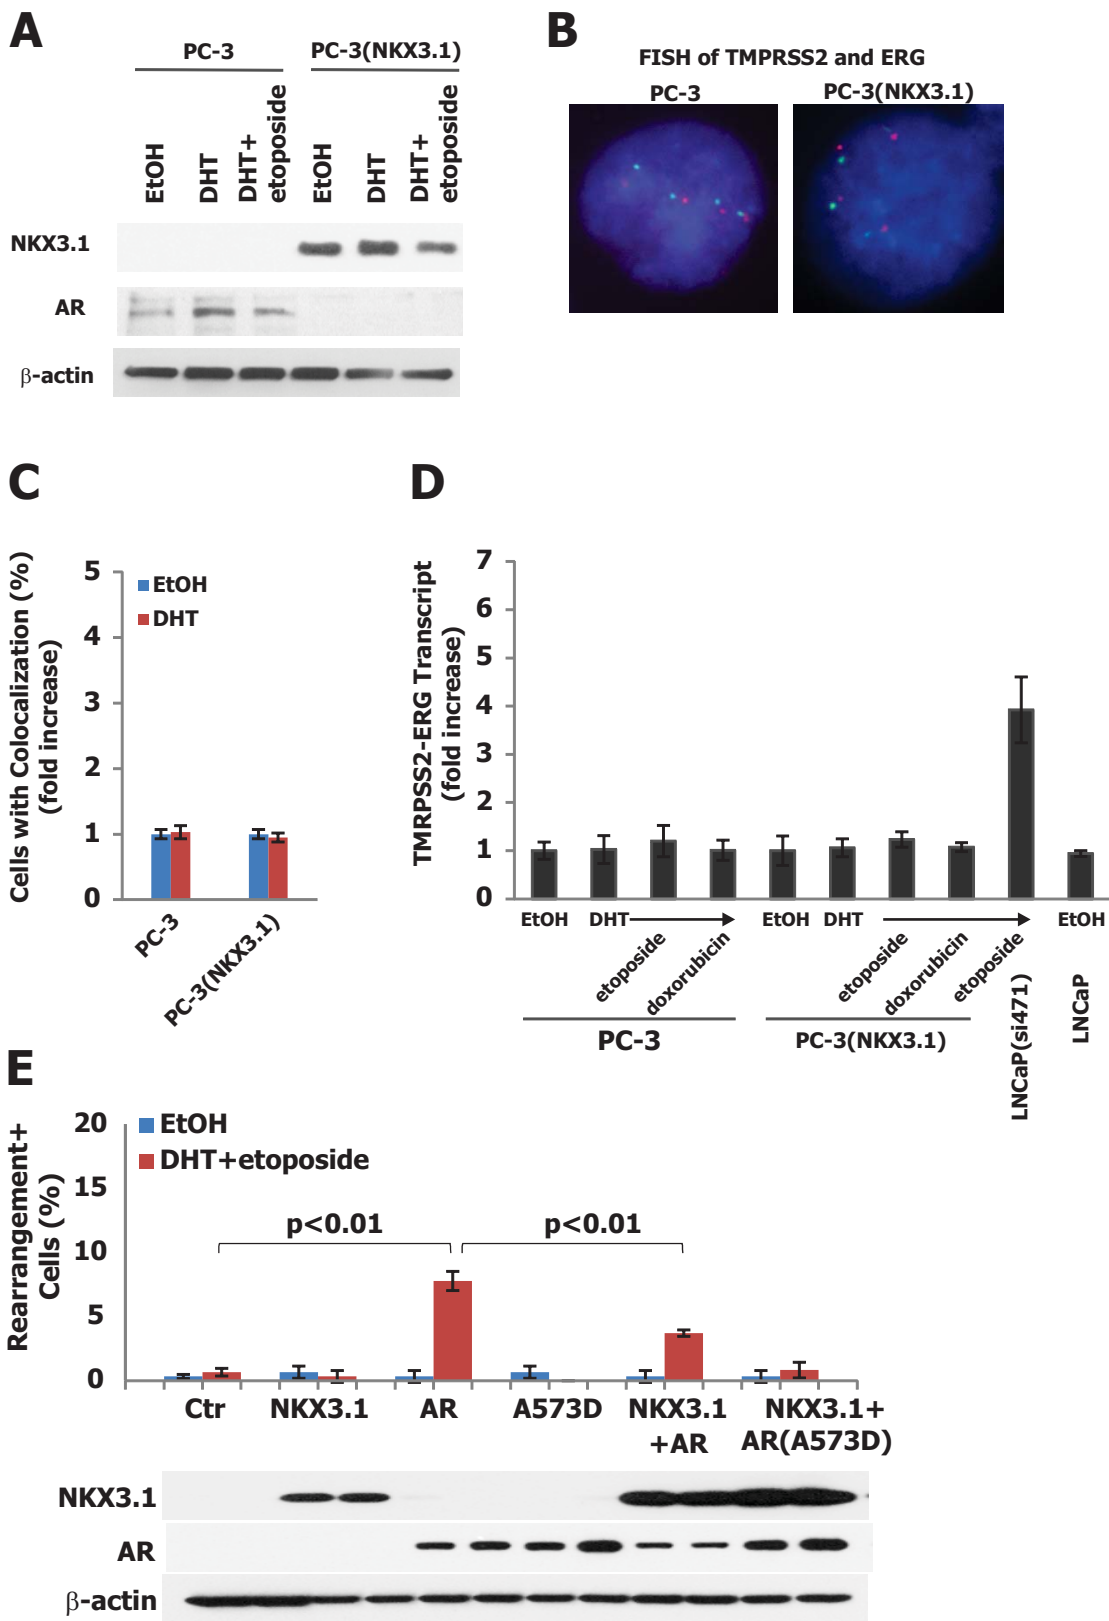

Bowen and Gelmann  
Figure S3

**A**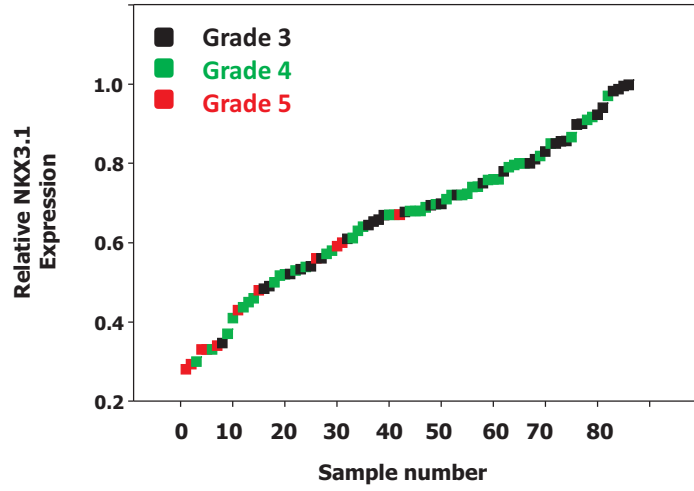**B**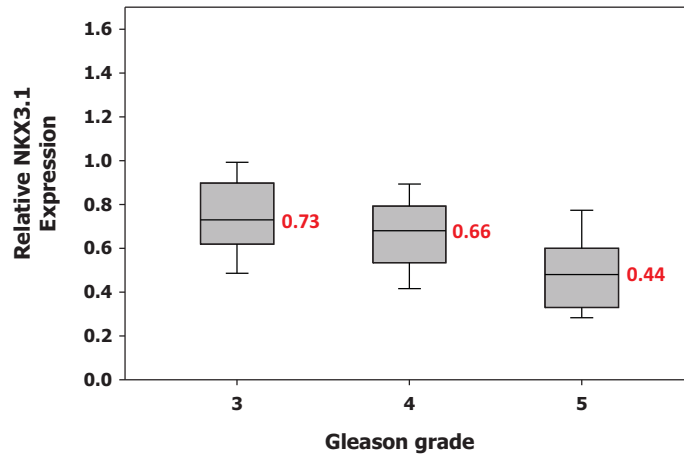**C**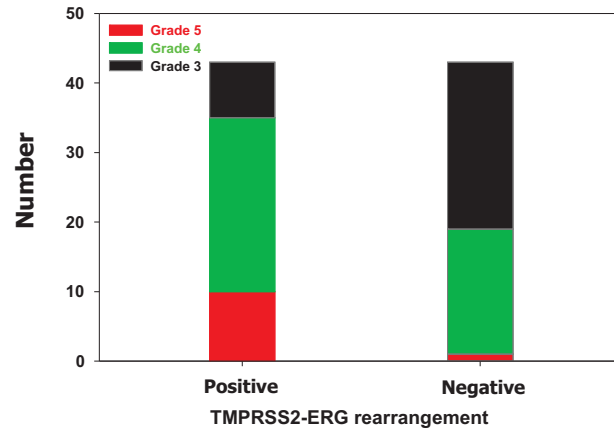

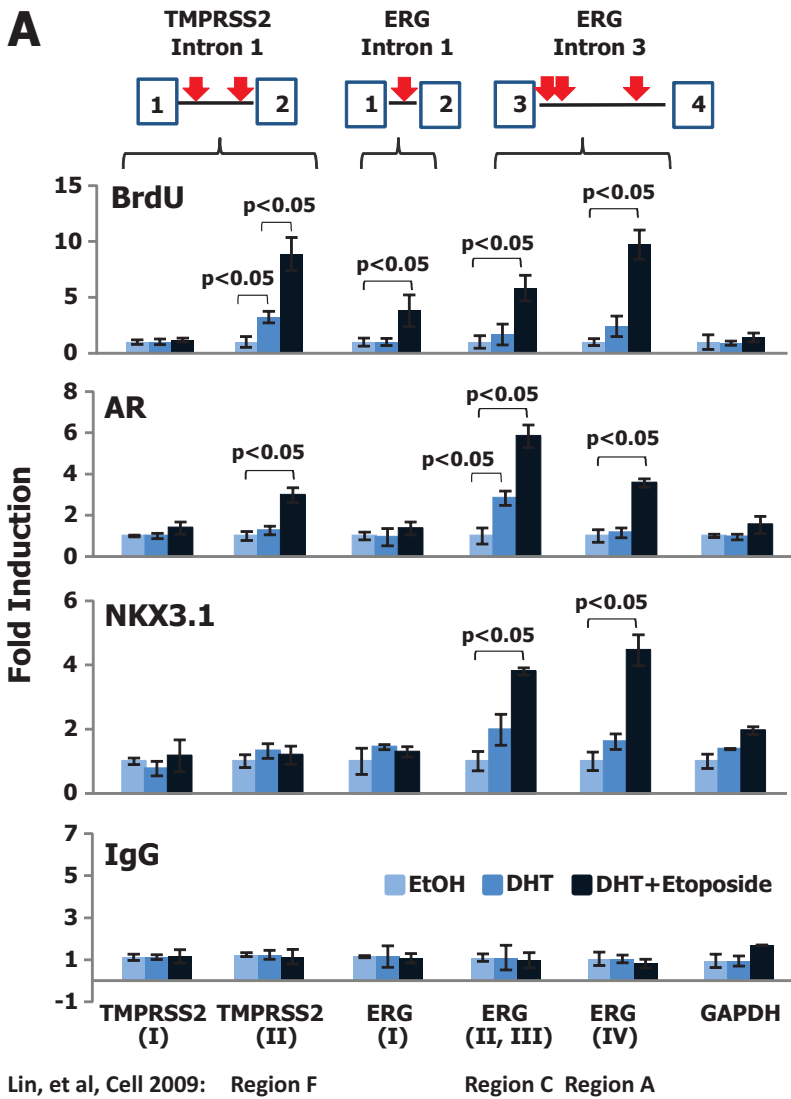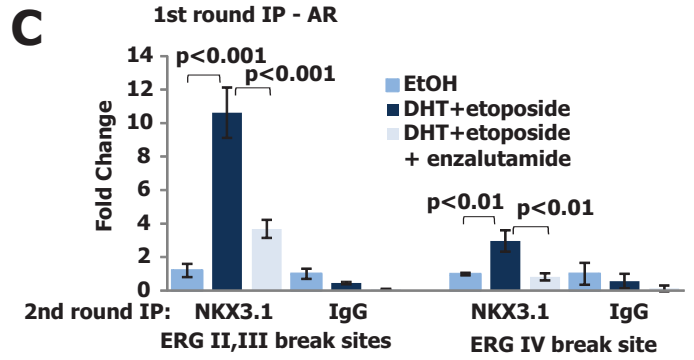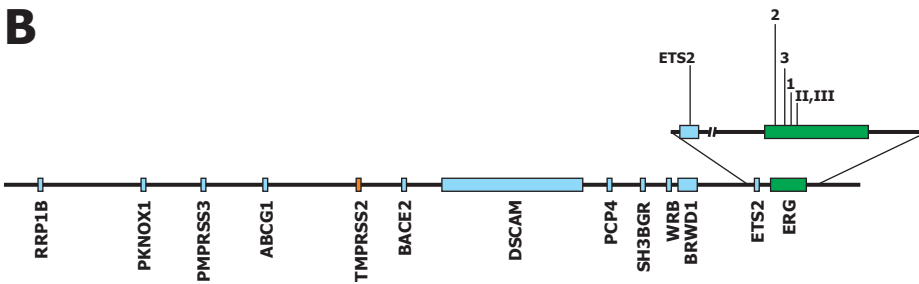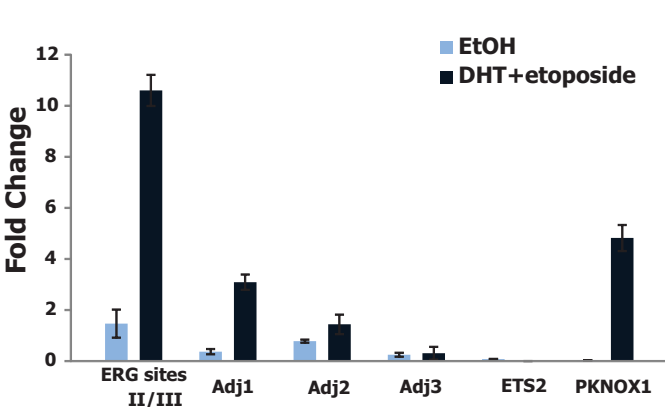

| Site     | Locus  | Distance (bp) from ... |     |      | PCR Primers                |
|----------|--------|------------------------|-----|------|----------------------------|
|          |        | II,III                 | ARE | NKE  |                            |
| Breakpoi | ERG    | 25                     | 73  | 895  | F 5'-CTGATTCATGCCAGACAC-3' |
| Adjacent | ERG    | 1333                   | 630 | 2293 | F 5'-TGAATTTGGGGGCACACAC-  |
| Adjacent | ERG    | 6016                   | 942 | 2273 | F 5'-TGCCAAGGCATGTTGATGTT  |
| Adjacent | ERG    | 2143                   | 777 | 801  | F 5'-GACTTACTGGTTCATGCAGAG |
| ETS2     | ETS2   | >20,00                 | 885 | 3017 | F 5'-AAGTGCCAACAGGCTTGAT   |
| PKNOX1   | PKNOX1 | >20,00                 | 0   | 19   | F 5'-ACTAGCGGACATCCCTGG-3' |

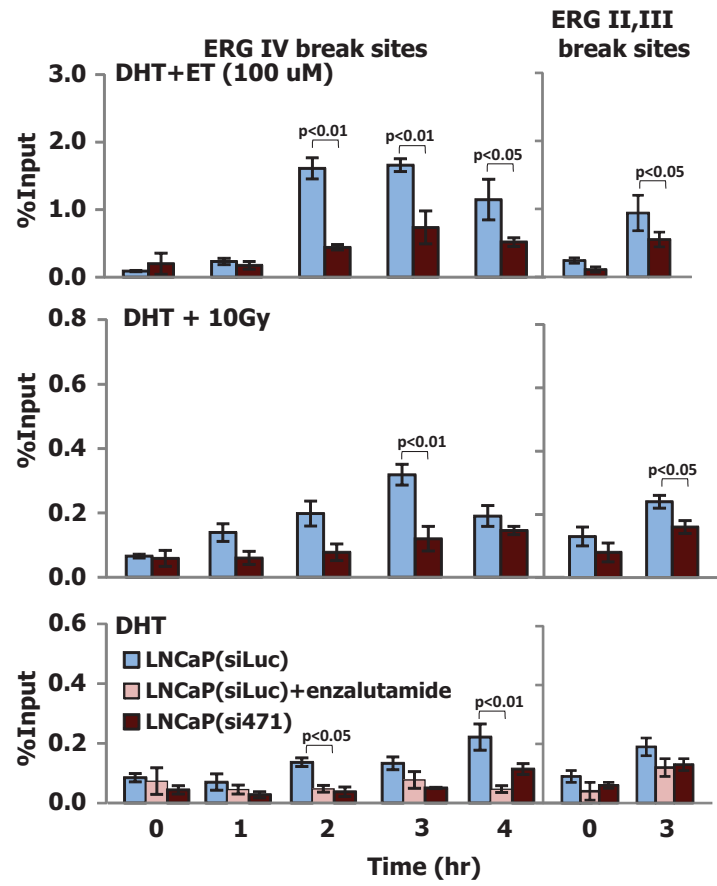

**Bowen and Gelmann  
Figure S6**

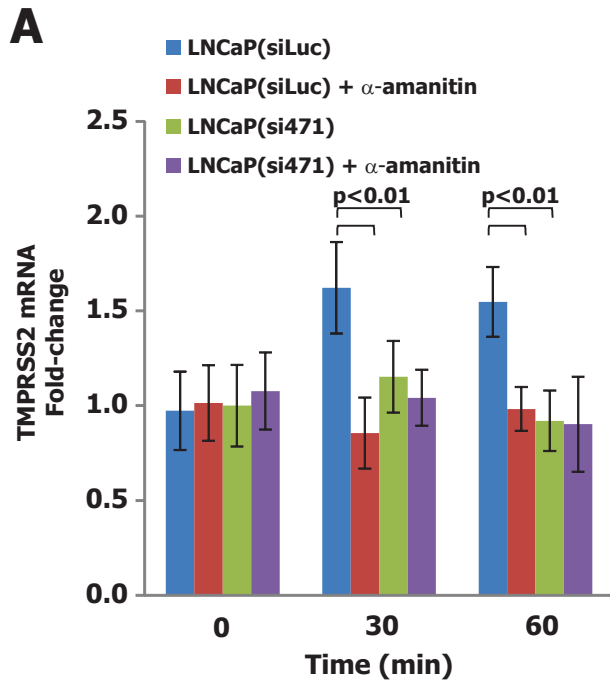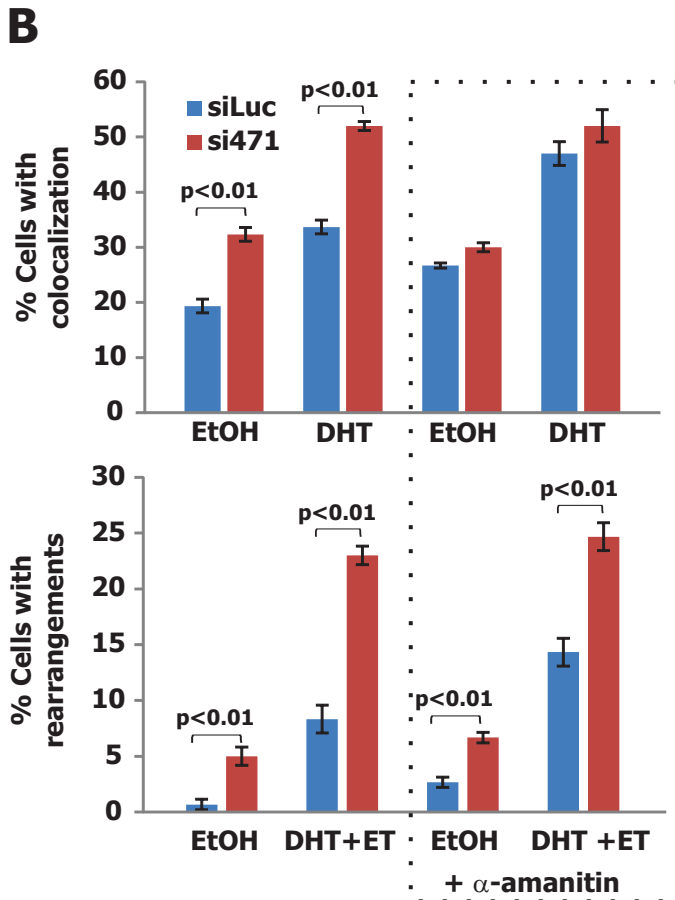

**Bowen and Gelmann  
Figure S7**
